# Supplementary material
Source: PubMed Central journal article supplement (PMC3313625)
Supplement: NIHMS357378-supplement-Supplementary_Data.pdf [file NIHMS357378-supplement-Supplementary_Data.pdf]

**Supplementary Material (SM)****Figures**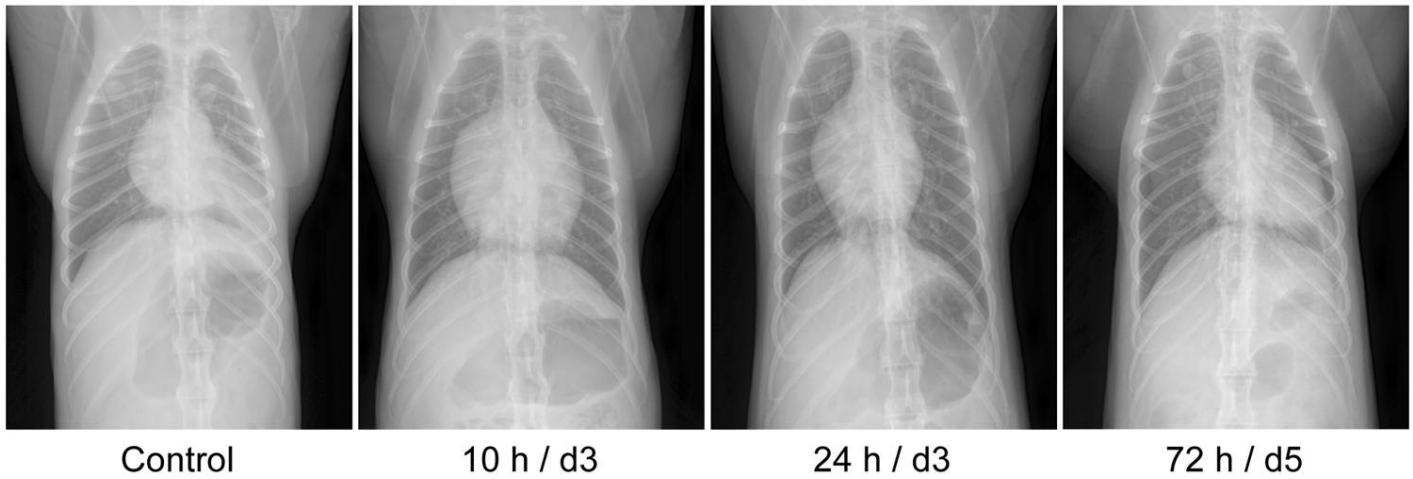

**Fig. S1.** Radiographic images of lung fields on day 6 post Hendra virus infection of African green monkeys. The control animal has moderate interstitial infiltrates evident in the right caudal lung lobe with effacement of the cardiac silhouette. Animals treated with m102.4, 10h/d3 and 24 h/d3, have no obvious radiographic changes. 72h/d5 treated animal demonstrated mild interstitial changes in caudal right lung lobe at the border of the diaphragm.

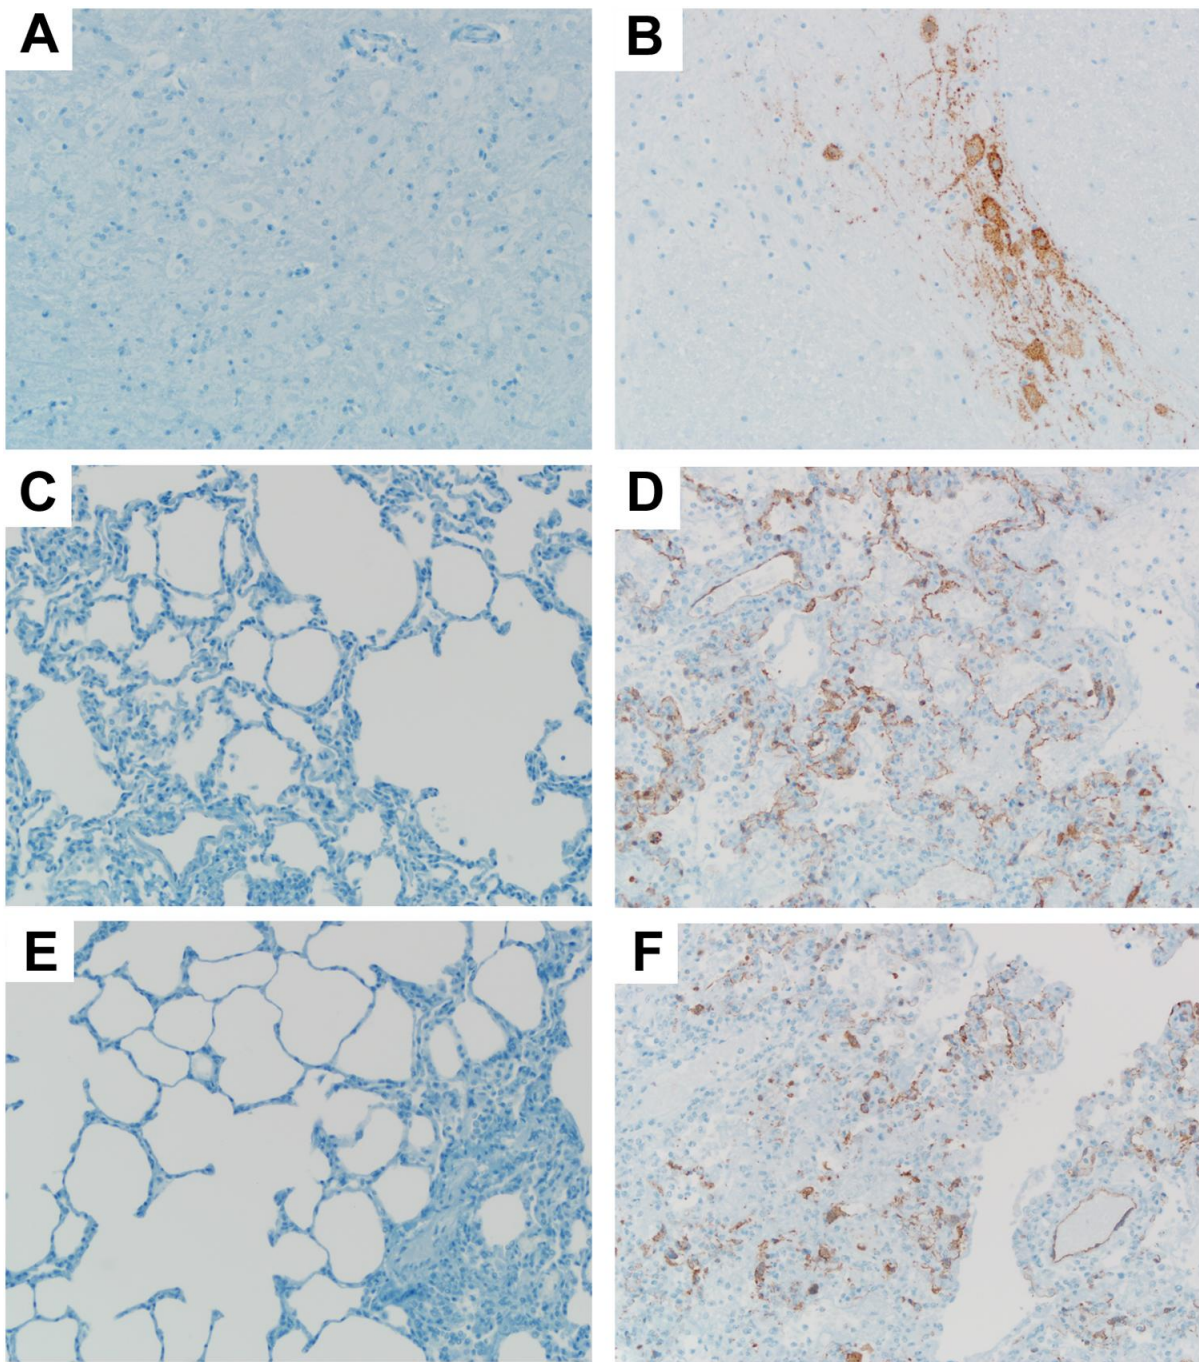

**Fig. S2.** Absence of Hendra virus antigen in the lung and brain of m102.4 treated African green monkeys. Localization of HeV antigen by immunohistochemical stain in the brain stem (A, B), lower lung (C, D) and middle lung (E, F) of AGM 23 (72hr/d5; left panels; treated) or AGM13 and AGM 17 (right panels; controls). Sections were stained with a NiV nucleoprotein (N) specific rabbit polyclonal antibody and images were obtained at an original magnification of at 20X.

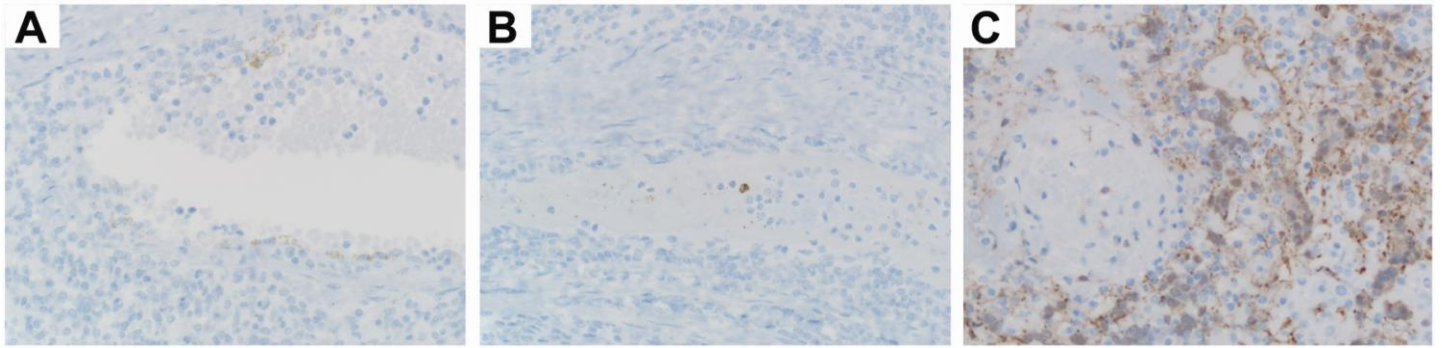

**Fig. S3.** Hendra virus antigen detection in spleens of African green monkeys that received m102.4 therapy. (A) Localization of HeV antigen by immunohistochemical stain in the spleen. Sections were stained with an N protein specific polyclonal rabbit antibody and images were obtained at an original magnification of at 40X; panel C was photographed at 20X. All images were adjusted to the same magnification and size; A. AGM 18 (10hr/d3); B. AGM 19 (24hr/d3); AGM 13 (control).

## Tables

**Table S1.** Clinical scoring and outcome of Hendra virus-infected African green monkeys.

| Subject                 | 1-2    | 3-4                                     | 5-6                                                           | 7-10*                                                                                                                                                                   | 11-14                                                                                                                                             | 15-22                                                                                             | 23-35                             |
|-------------------------|--------|-----------------------------------------|---------------------------------------------------------------|-------------------------------------------------------------------------------------------------------------------------------------------------------------------------|---------------------------------------------------------------------------------------------------------------------------------------------------|---------------------------------------------------------------------------------------------------|-----------------------------------|
| AGM 13<br>(control)     | normal | temperature (3); decreased activity (3) | decreased activity (3); respiration rate (3)                  | decreased activity (3); respiration rate (5)                                                                                                                            | euthanized (day 8)                                                                                                                                |                                                                                                   |                                   |
| AGM 14<br>(10 hr&72 hr) | normal | mildly depressed *(3)                   | mildly depressed *(3)                                         | normal                                                                                                                                                                  | normal                                                                                                                                            | normal                                                                                            | normal                            |
| AGM 15<br>(10hr&72hr)   | normal | normal                                  | normal                                                        | normal                                                                                                                                                                  | normal                                                                                                                                            | normal                                                                                            | normal                            |
| AGM 16<br>(10 hr&72hr)  | normal | mildly depressed*(3)                    | mildly depressed*(3)                                          | normal                                                                                                                                                                  | normal                                                                                                                                            | normal                                                                                            | normal                            |
| AGM 17<br>(control)     | normal | decreased activity (3)                  | food intake (5); decreased activity (3); respiration rate (5) | food intake (5); decreased activity (5); respiration rate (5)                                                                                                           | euthanized (day 8)                                                                                                                                |                                                                                                   |                                   |
| AGM 18<br>(10 hr&72hr)  | normal | normal                                  | normal                                                        | normal                                                                                                                                                                  | normal                                                                                                                                            | normal                                                                                            | normal                            |
| AGM 19<br>(24hr&72hr)   | normal | normal                                  | normal                                                        | normal                                                                                                                                                                  | normal                                                                                                                                            | normal                                                                                            | normal                            |
| AGM 20<br>(24 hr&72hr)  | normal | normal                                  | normal                                                        | normal                                                                                                                                                                  | normal                                                                                                                                            | normal                                                                                            | normal                            |
| AGM 21<br>(24hr&72hr)   | normal | normal                                  | normal                                                        | normal                                                                                                                                                                  | normal                                                                                                                                            | normal                                                                                            | normal                            |
| AGM 22<br>(24hr&72hr)   | normal | normal                                  | normal                                                        | normal                                                                                                                                                                  | normal                                                                                                                                            | normal                                                                                            | normal                            |
| AGM 23<br>(72hr&5d)     | normal | normal                                  | normal                                                        | food intake (3), decreased activity, depressed (5); neurological symptoms (balance problems, tremors in legs and feet, head tilt - begin day 9) (10)                    | food intake (5); weight loss, decreased activity (3); neurological symptoms (balance problems, tremors in legs and feet, head tilt, seizure) (15) | food intake (3); neurological symptoms improving after day 18 (10)                                | slight head tilt until day 24 (5) |
| AGM 24<br>(72 hr&5d)    | normal | normal                                  | normal                                                        | food intake (5); weight loss, decreased activity, depressed (5); neurological symptoms (balance problems, tremors in legs and feet, head tilt - starting at day 9) (10) | food intake (5); weight loss, decreased activity (5); neurological symptoms (balance problems, tremors in legs and feet, head tilt) (10)          | food intake (3); neurological symptoms improving after day 17 (5)                                 | normal                            |
| AGM 25<br>(72hr&5d)     | normal | normal                                  | food intake (3)                                               | food intake (5); weight loss (3); neurological symptoms (balance problems, tremors in legs and feet, head tilt - starting at day 9) (10)                                | food intake (5); weight loss (3); neurological symptoms (balance problems, tremors in legs and feet, head tilt) (10)                              | food intake (3); neurological symptoms improving after day 17, slight head tilt until day 24 (10) | normal                            |
| AGM 26<br>(72hr&5d)     | normal | normal                                  | normal                                                        | food intake (3)                                                                                                                                                         | food intake (3); neurological symptoms (balance problems, head tilt - starting at day 11)                                                         | food intake (3); slight head tilt until day 24 (10)                                               | normal                            |

- Normal = no clinical signs
- Posture/attitude: (3) = weight loss/piloerection/mildly depressed; (5) = weight/piloerection/decreased activity/depressed
- Neurological symptoms: (5) = balance problems, ataxia, tremor; (10) head tilt; (15) seizures/paralysis
- Appetite: (3) = reduced <75%; (5) = no food intake
- Temperature (normal <102.2 °F): (3) = elevated temperature (102.2-104° F), (5) = high temperature (>104°F)
- Respiration rate: (3) = >40/min; (5) = >50/min (open mouth breathing)

\*most likely due to problems with the intravenous drug administration with this animal.

**Table S2.** Gross Pathology summary of Hendra virus-infected African green monkeys.

| Subject                 | Lung                                 | Spleen          | Bladder                      | Brain                    |
|-------------------------|--------------------------------------|-----------------|------------------------------|--------------------------|
| AGM 13<br>(control)     | Severe lesions on<br>100% of surface | Mildly enlarged | Normal                       | Congestion of<br>vessels |
| AGM 14<br>(10 hr&72 hr) | N/D                                  | N/D             | N/D                          | N/D                      |
| AGM 15<br>(10hr&72hr)   | N/D                                  | N/D             | N/D                          | N/D                      |
| AGM 16<br>(10 hr&72hr)  | N/D                                  | N/D             | N/D                          | N/D                      |
| AGM 17<br>(control)     | Severe lesions on<br>100% of surface | Mildly enlarged | Focal reddening<br>of mucosa | Congestion of<br>vessels |
| AGM 18<br>(10 hr&72hr)  | Normal                               | Normal          | Normal                       | Normal                   |
| AGM 19<br>(24hr&72hr)   | Normal                               | Normal          | Normal                       | Normal                   |
| AGM 20<br>(24 hr&72hr)  | Normal                               | Normal          | Normal                       | Normal                   |
| AGM 21<br>(24hr&72hr)   | Normal                               | Normal          | Normal                       | Normal                   |
| AGM 22<br>(24hr&72hr)   | Normal                               | Normal          | Normal                       | Normal                   |
| AGM 23<br>(72hr&5d)     | Normal                               | Normal          | Normal                       | Normal                   |
| AGM 24<br>(72 hr&5d)    | Normal                               | Normal          | Normal                       | Normal                   |
| AGM 25<br>(72hr&5d)     | Normal                               | Normal          | Normal                       | Normal                   |
| AGM 26<br>(72hr&5d)     | Normal                               | Normal          | Normal                       | Normal                   |

- Normal = no clinical signs
- N/D = Not done
